# Supplementary material
Source: publisher figshare collection journal article supplement (https://geolsoc.figshare.com/articles/dataset/_/3452837)
Supplement: Supplementary file 1 [file 1]

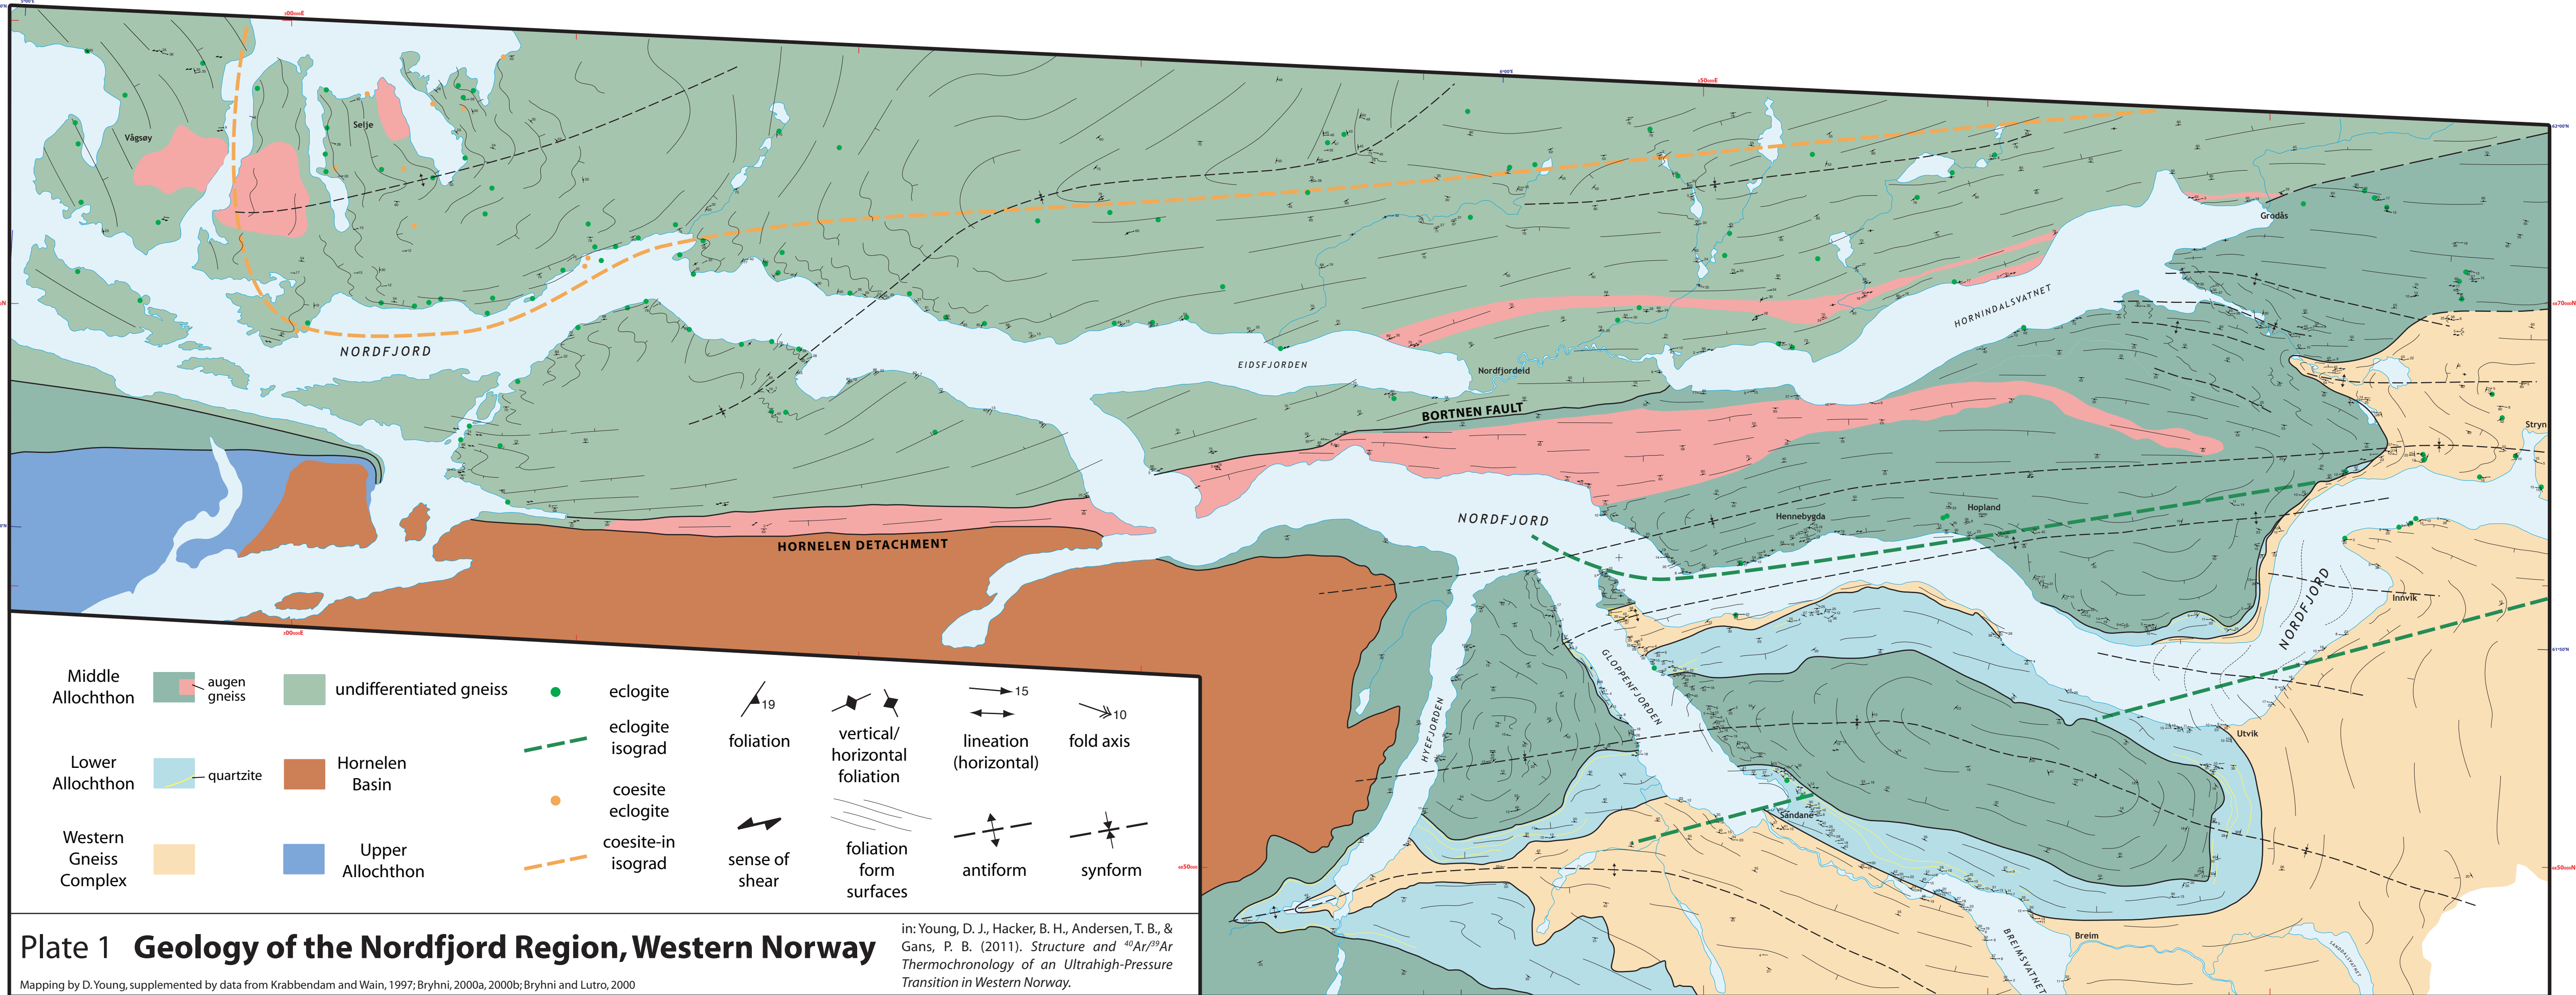

# Plate 1 Geology of the Nordfjord Region, Western Norway

in: Young, D. J., Hacker, B. H., Andersen, T. B., & Gans, P. B. (2011). *Structure and <sup>40</sup>Ar/<sup>39</sup>Ar Thermochronology of an Ultrahigh-Pressure Transition in Western Norway.*

Mapping by D. Young, supplemented by data from Krabbendam and Wain, 1997; Bryhni, 2000a, 2000b; Bryhni and Lutro, 2000
